# Supplementary material
Source: PubMed Central journal article supplement (PMC3696745)
Supplement: 1219256110_pnas.201219256SI.pdf [file 1219256110_pnas.201219256SI.pdf]

# Supporting Information

Allegra Mascaro et al. 10.1073/pnas.1219256110

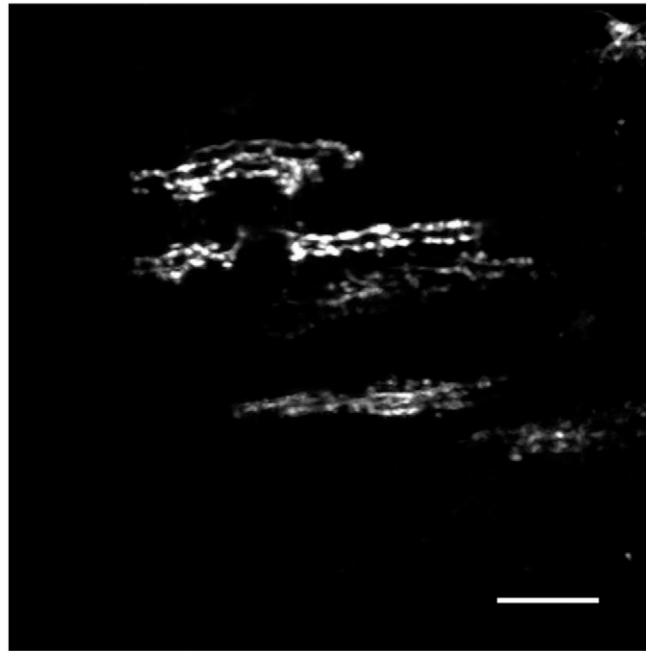

**Fig. S1.** Climbing fibers (CFs) GFP labeling induced by viral injection. Representative two-photon fluorescence (TPF) transversal view (maximum intensity z-projection of 20 images acquired from 30 to 70  $\mu\text{m}$  deep below the pial surface) of sparsely GFP-labeled CFs in the cerebellar molecular layer. (Scale bar, 20  $\mu\text{m}$ .)

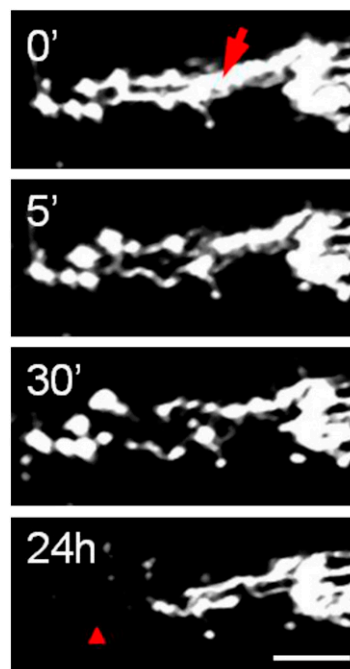

**Fig. S2.** Short-term effects of laser nanosurgery on GFP-labeled CF. Time lapse of maximum intensity z-projections (60  $\mu\text{m}$  thick) of an irradiated CF. Red arrowhead highlights the degeneration of the CF distal portion. (Scale bar, 10  $\mu\text{m}$ .)

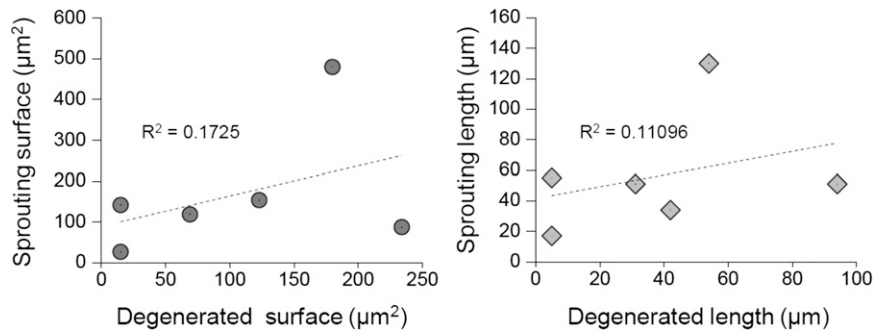

**Fig. 53.** Correlation between degeneration and sprouting. The two graphs correlate the degenerated and sprouting extent in the laser axotomized CFs. Surface values on the *Left* refer to the area included in a segmented line around the degenerated distal region or around the sprouted branches. The length in the graph on the *Right* is the summed values of the length of single branches involved in degeneration or sprouting for each CF.

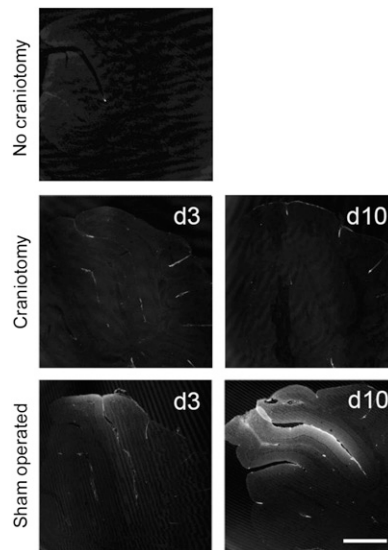

**Fig. 54.** Application of the optical window does not significantly induce microglial activation. The microglia was revealed by anti-CD11b immunostaining (mouse monoclonal; Serotec) in cerebellar coronal slices. Images in the second row are obtained 3 d and 10 d after application of the optical window. Microglia activation is comparable with that observed in naïve mice (*Upper* image). The last row shows progressively increased glial activation measured 3 d and 10 d after a sham craniotomy. In this case, we applied a downward pressure on the brain surface with the tweezers tip. (Scale bar, 750 µm.)

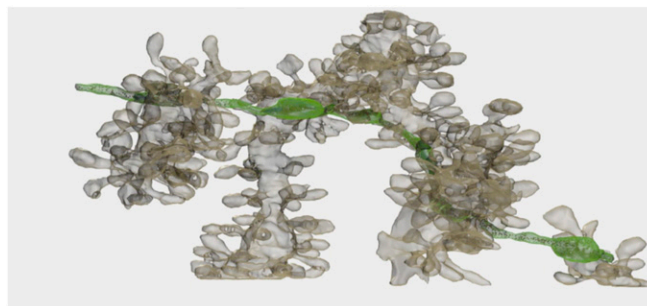

**Movie S1.** Rotation of the 3D reconstruction shown in Fig. 4B, Center.

[Movie S1](#)
